# Supplementary material for: d-Amino Acids and Classical Neurotransmitters in Healthy and Type 2 Diabetes-Affected Human Pancreatic Islets of Langerhans
Source: MDPI journal article supplement (doi:10.3390/metabo12090799), 2022-08-27
Supplement: s1 [file s1]

## Supplementary Materials

### D-Amino acids and classical neurotransmitters in healthy and type 2 diabetes affected human pancreatic islets of Langerhans

Cindy J. Lee<sup>1</sup>, Jack H. Schnieders<sup>1</sup>, Stanislav S. Rubakhin<sup>1</sup>, Amit V. Patel<sup>1</sup>, Chengyang Liu<sup>2</sup>, Ali Naji<sup>2</sup>, Jonathan V. Sweedler<sup>1,\*</sup>

<sup>1</sup> Department of Chemistry and the Beckman Institute, University of Illinois Urbana-Champaign, Urbana, IL 61801, United States

<sup>2</sup> Department of Surgery, Perelman School of medicine, University of Pennsylvania, Philadelphia, PA 19104 United States

\*Corresponding author: jsweedler@illinois.edu (Jonathan V. Sweedler)

## Table of Contents

|                                            |                                                                                                                                                                                                   |
|--------------------------------------------|---------------------------------------------------------------------------------------------------------------------------------------------------------------------------------------------------|
| <b>Supplementary Materials and Methods</b> | S-2                                                                                                                                                                                               |
| <b>Table S1</b>                            | Summary of biochemical characteristics of measured human pancreatic islets that varied by individual to individual in three groups: healthy, prediabetes, and type 2 diabetes (T2D)-affected. S-3 |
| <b>Figure S1</b>                           | Levels of L-Ser and L-Asp in healthy versus type 2 diabetes (T2D)-affected human pancreatic islets. S-5                                                                                           |
| <b>Figure S2</b>                           | Scatter plots of BMI and each D-Ser, D-Asp, and classical neurotransmitters. S-6                                                                                                                  |
| <b>Figure S3</b>                           | Scatter plots of HbA1c and each D-Ser, D-Asp, and classical neurotransmitters. S-7                                                                                                                |

## **Supplementary Materials and Methods:**

### **Capillary zone electrophoresis (CZE)-LIF for chiral separation**

#### *Sample desalting*

Homemade centrifuge extraction tips were prepared using a 200  $\mu$ L pipette tip packed with three layers of punched-out Empore SPE Disks (0.7-0.8 mg of polystyrene-divinylbenzene (SDB-XC)). The disk's SDB-XC material was conditioned with 15  $\mu$ L of ACN and then 45  $\mu$ L of water. The NDA-derivatized samples were dried in a SpeedVac, reconstituted in a minimum volume of water (typically 5  $\mu$ L), and loaded onto the tips. The tips were washed with 5  $\mu$ L of water aliquots twice. The analytes were eluted with 45  $\mu$ L of ACN. The resulting samples were dried in a SpeedVac and reconstituted in water for CE-LIF analysis.

#### *Enzyme purification for confirmation of D-AA identification*

Before the enzymatic treatment, 15 U/mL DAAO and 68  $\mu$ g/mL catalase, each in PBS 1X (Gibco, ThermoFisher), were prepared using the DAAO from porcine kidney (Catalog# A5222, Sigma-Aldrich) and catalase from bovine liver (Catalog# C30, Sigma-Aldrich). Both reagents underwent further purification, as the presence of interfering compound within the enzyme solution co-eluted with the analyte peak and prevented the confirmation by CE-LIF. 150  $\mu$ L of each prepared reagent was transferred to 3kDa MWCO filters (Amicon Ultra 0.5 mL centrifugal filters), conditioned with 500  $\mu$ L of PBS 1X. The reagents were centrifuged at  $14,000 \times g$  for 15 min. 150  $\mu$ L of PBS 1X was added to the same filter and centrifuged again at  $14,000 \times g$  for 15 min. The concentrated enzymes were recovered by centrifuging the filters upside down in tubes at  $1,000 \times g$  for 2 min. The concentration of each purified enzyme was determined using a NanoDrop and further diluted in PBS 1X to make purified 15 U/mL DAAO and 68  $\mu$ g/mL catalase.

### **ZipChip-CZE-ESI-MS for neurotransmitters**

#### *Sample desalting*

Aliquots of the extracted islet samples stored at  $-80^\circ\text{C}$  were dried in a SpeedVac. The resulting samples were resuspended in a 50  $\mu$ L mixture of isopropanol and ACN in a 4:1 volume ratio and centrifuged at  $15,000 \times g$  for 5 min at  $4^\circ\text{C}$ , solubilizing analytes and further cleaning up the samples. The supernatant was dried in a SpeedVac and stored at  $-80^\circ\text{C}$  until analysis.

**Table S1** Summary of biochemical characteristics of measured human pancreatic islets that varied by individual to individual in three groups: healthy, prediabetes, and type 2 diabetes (T2D)-affected.

| Type                          | Subject No. | BMI  | HbA1c (%) | D-Ser    | D-Ser (%) | D-Asp    | D-Asp (%) | Serotonin | GABA    | Ach      | Glutamate |
|-------------------------------|-------------|------|-----------|----------|-----------|----------|-----------|-----------|---------|----------|-----------|
| <b>Healthy</b><br>(n = 9)     | 1           | n/a  | n/a       | 1.6E-01  | 4.8       | 1.7E-01  | 1.1       | 2.5E-02   | 1.1E+01 | 3.4E-02  | 1.0E+00   |
|                               | 2           | n/a  | n/a       | 8.3E-01  | 4.7       | 1.0E-01  | 0.5       | 4.7E-02   | 4.7E+01 | 1.6E-01  | 2.7E+01   |
|                               | 3           | n/a  | n/a       | 5.8E+00  | 6.6       | 1.5E+00  | 0.5       | 1.2E+00   | 7.2E+02 | 4.3E-01  | 7.7E+01   |
|                               | 4           | n/a  | n/a       | 4.5E-01  | 0.7       | 1.1E+00  | 0.5       | 1.9E+00   | 5.5E+01 | 1.9E-01  | 2.7E+01   |
|                               | 5           | 20.3 | 4.8       | 1.7E-01  | 1.5       | 2.1E-01  | 3.2*      | 5.7E-02   | 1.5E+02 | 3.3E-01  | 8.2E+00   |
|                               | 6           | 26.2 | 5.3       | 2.2E-01  | 2.2       | 3.2E-01  | 1.9       | 3.4E-01   | 1.9E+02 | 1.6E+00* | 1.9E+01   |
|                               | 7           | 35   | n/a       | 1.9E-01  | 1.7       | 8.2E-02  | 0.2       | 1.6E-02   | 5.2E+01 | 1.4E-01  | 4.1E+00   |
|                               | 8           | 28   | n/a       | 2.1E-01  | 1.9       | 3.8E-01  | 0.4       | 3.8E+00*  | 6.1E+01 | 4.2E-01  | 6.5E+00   |
|                               | 9           | 30   | 5.4       | 1.1E-01  | 0.6       | 6.1E-01  | 1.2       | 1.3E-01   | 1.8E+01 | 1.1E-01  | 1.1E+01   |
| <b>Prediabetes</b><br>(n = 4) | 10          | 33.2 | 6.1       | 2.6E-01  | 0.6       | 1.2E-01  | 0.8       | 1.7E-02   | 1.1E+02 | 1.6E-01  | 3.4E+01   |
|                               | 11          | 27   | 5.9       | 2.1E-01  | 0.5       | 4.1E-02  | 0.5       | 1.4E-01   | 1.4E+01 | 6.3E-02  | 7.4E+00   |
|                               | 12          | 24   | 5.8       | 2.5E-01  | 0.9       | 8.0E-02  | 0.5       | 1.9E-01   | 2.1E+01 | 1.2E-01  | 6.9E+00   |
|                               | 13          | 27.5 | 5.7       | 1.6E-01  | 1.1       | 9.0E-02  | 1.3       | 1.1E-01   | 1.0E+01 | 5.7E-01  | 1.5E+01   |
| <b>T2D</b><br>(n = 9)         | 14          | n/a  | n/a       | 2.1E-01  | 2.9       | 2.4E-01  | 0.7       | 1.8E-02   | 3.5E+01 | 3.7E-03  | 8.0E+00   |
|                               | 15          | n/a  | 6.7       | 7.3E-01* | 1.3       | 6.5E-01* | 0.3       | n.d.      | 1.6E+02 | 7.5E-01  | 7.4E+01   |
|                               | 16          | 38   | 6.3       | 1.2E-01  | 0.4       | 2.3E-01  | 0.9       | n.d.      | 3.0E+01 | 3.1E-01  | 2.5E+01   |
|                               | 17          | 35.9 | 9.7       | 4.5E-02  | 0.8       | 2.0E-02  | 0.5       | 1.1E-02   | 9.5E+00 | 2.3E-02  | 1.9E+00   |
|                               | 18          | 35.8 | n/a       | 3.9E-01  | 0.9       | 2.4E-01  | 1.4       | n.d.      | 2.1E+00 | 8.7E-02  | 1.7E-01   |
|                               | 19          | 37.4 | 6.4       | 4.7E-01  | 0.6       | 1.9E-01  | 1.0       | n.d.      | 1.6E+01 | 6.4E-01  | 6.6E+00   |
|                               | 20          | 26.7 | 6.0       | 2.0E-01  | 0.8       | 1.1E-01  | 0.9       | n.d.      | 4.7E+01 | 1.6E-01  | 2.8E+02*  |
|                               | 21          | 28   | n/a       | 2.5E-01  | 1.0       | 4.6E-02  | 0.9       | n.d.      | 1.8E-01 | 8.4E-03  | 3.7E-01   |
|                               | 22          | 33   | 10.8      | 2.1E-01  | 0.5       | 6.2E-02  | 1.4       | 1.5E-02   | 3.1E+00 | 3.1E-02  | 3.5E+00   |

**Table S1 (cont.)**

| Type                          | Subject No. | Dopamine | Tyramine | Synephrine | Norepinephrine | Epinephrine |
|-------------------------------|-------------|----------|----------|------------|----------------|-------------|
| <b>Healthy</b><br>(n = 9)     | 1           | 9.4E-03  | 1.9E-02  | 2.6E-02    | n.d.           | n.d.        |
|                               | 2           | 3.7E-02  | n.d.     | 1.3E-01    | n.d.           | n.d.        |
|                               | 3           | n.d.     | n.d.     | 5.0E-01    | n.d.           | n.d.        |
|                               | 4           | n.d.     | 8.4E-02  | 4.0E+00    | n.d.           | n.d.        |
|                               | 5           | 4.9E-01  | n.d.     | n.d.       | n.d.           | n.d.        |
|                               | 6           | 2.9E-01  | 1.8E-01  | n.d.       | 3.2E-02        | n.d.        |
|                               | 7           | n.d.     | n.d.     | n.d.       | n.d.           | n.d.        |
|                               | 8           | n.d.     | n.d.     | n.d.       | n.d.           | n.d.        |
|                               | 9           | n.d.     | 1.2E-01  | n.d.       | 6.0E-03        | 5.4E-03     |
| <b>Prediabetes</b><br>(n = 4) | 10          | n.d.     | 1.3E-02  | 3.5E-03    | n.d.           | n.d.        |
|                               | 11          | n.d.     | 5.3E-02  | n.d.       | n.d.           | n.d.        |
|                               | 12          | 1.3E-01  | 1.2E-01  | 7.4E-03    | 7.4E-02        | 2.1E-03     |
|                               | 13          | n.d.     | 1.8E-02  | 6.1E-03    | 0.0E+00        | 7.0E-03     |
| <b>T2D</b><br>(n = 9)         | 14          | 1.6E-02  | 2.4E-02  | 2.7E-01    | n.d.           | n.d.        |
|                               | 15          | n.d.     | 8.5E-02  | n.d.       | n.d.           | n.d.        |
|                               | 16          | n.d.     | n.d.     | n.d.       | n.d.           | n.d.        |
|                               | 17          | 3.6E-02  | 1.4E-02  | n.d.       | 2.7E-01        | n.d.        |
|                               | 18          | n.d.     | n.d.     | n.d.       | n.d.           | n.d.        |
|                               | 19          | n.d.     | n.d.     | n.d.       | n.d.           | n.d.        |
|                               | 20          | n.d.     | n.d.     | n.d.       | n.d.           | n.d.        |
|                               | 21          | 2.8E-03  | n.d.     | n.d.       | 1.4E-01        | n.d.        |
|                               | 22          | n.d.     | n.d.     | n.d.       | n.d.           | n.d.        |

Ach, acetylcholine; n/a, not available; n.d., not detected; \*, outlier excluded from correlation plot.

Values are shown in pmole/μg protein unless otherwise noted.

Tryptamine and L-DOPA are not included in this table since they were not detected in any of the measured samples.

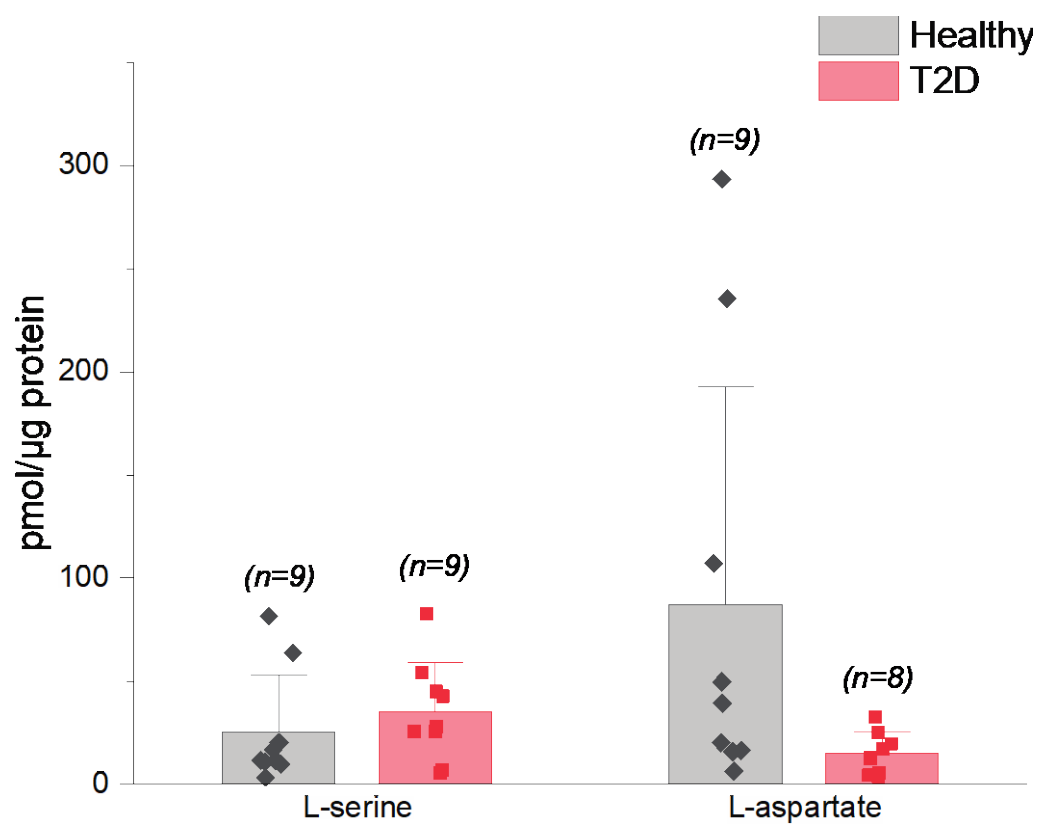

**Figure S1.** Levels of L-Ser and L-Asp in healthy versus type 2 diabetes (T2D)-affected human pancreatic islets. Values represent mean  $\pm$  SD of 8-9 human islet samples.

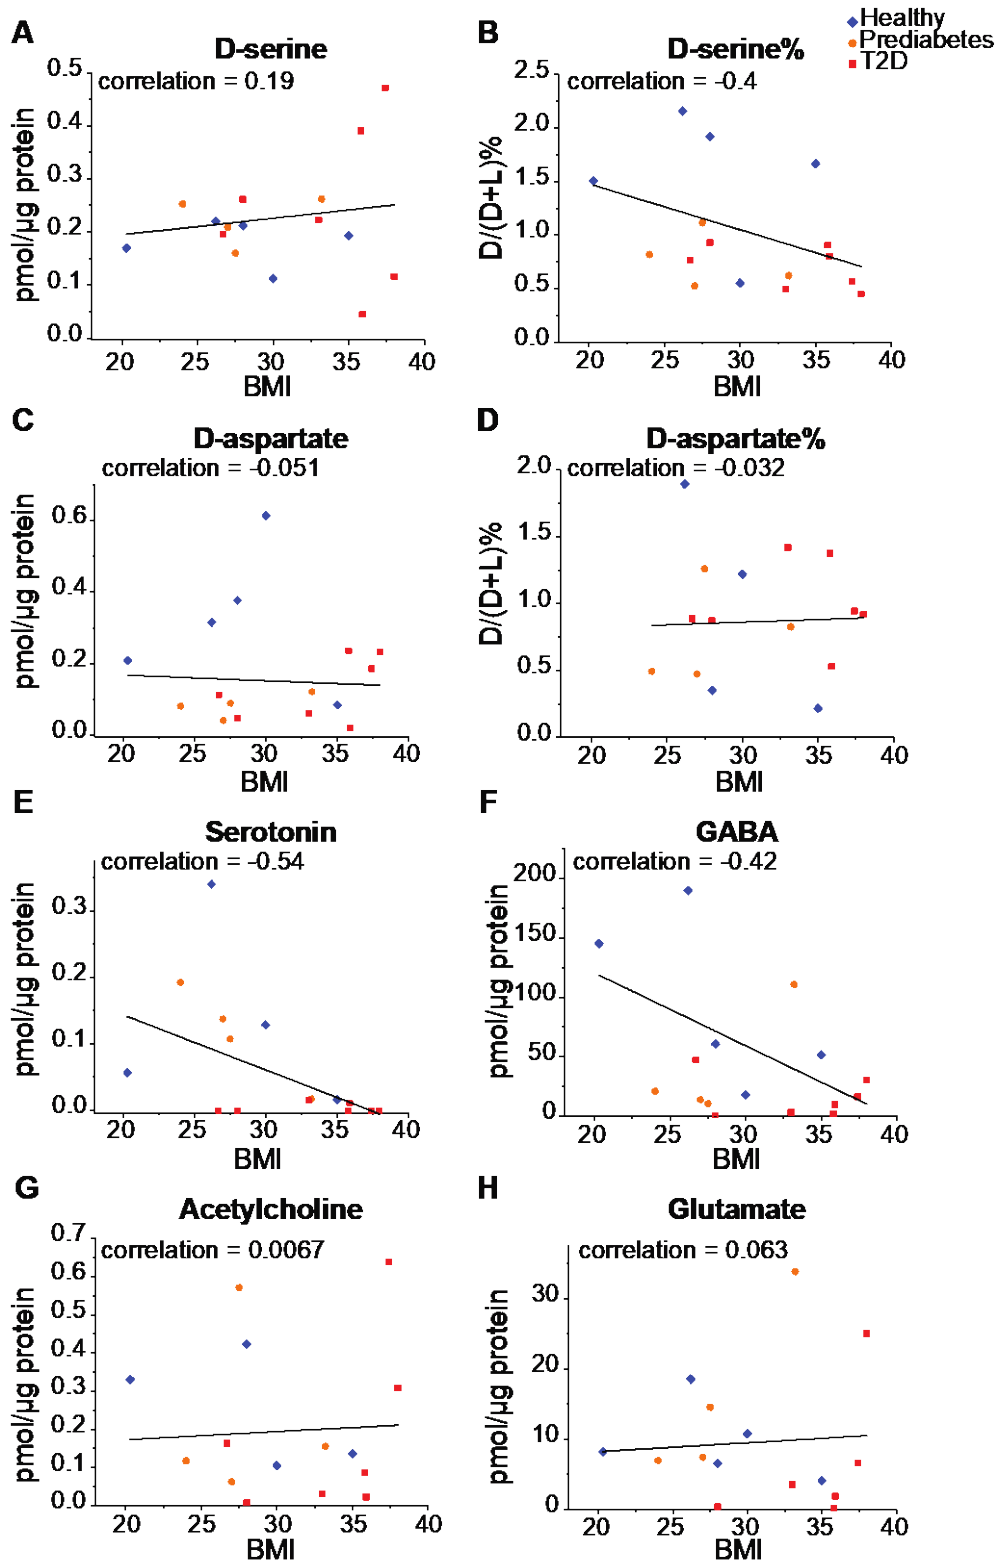

**Figure S2.** Scatter plots of BMI and each D-Ser, D-Asp, and classical neurotransmitters. The Pearson correlation coefficient is shown on each plot.

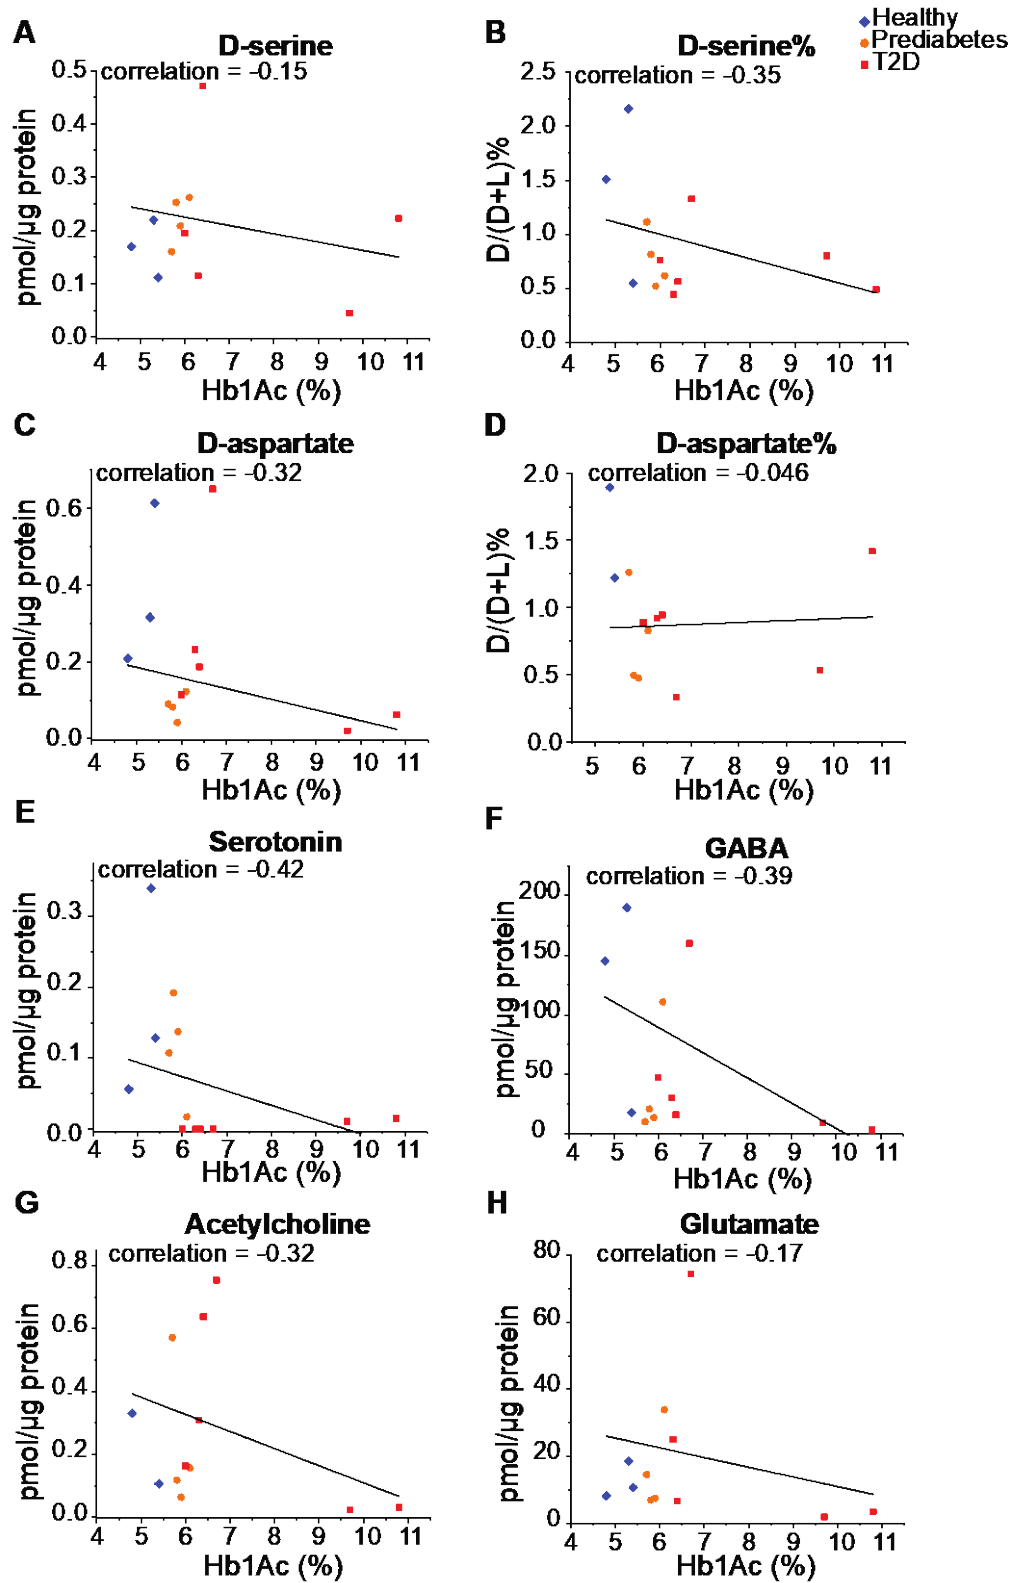

**Figure S3.** Scatter plots of HbA1c and each D-Ser, D-Asp, and classical neurotransmitters. The Pearson correlation coefficient is shown on each plot.
